# Supplementary material for: Pressure shock fronts formed by ultra-fast shear cracks in viscoelastic materials
Source: Springer Nature journal article supplement (doi:10.1038/s41467-018-07139-4), 2018-11-06
Supplement: MOESM3 [file 41467_2018_7139_MOESM3_ESM.pdf]

## Description of Additional Supplementary Files

**File Name:** Supplementary Movie 1

**Description:** Rupture with pressure and shear shock fronts. The temporal evolution of the full-field volumetric strain rate,  $|\dot{\epsilon}|$ , is shown for the experiment with PMMA discussed in the text ( $P = 21$  MPa,  $\alpha = 29^\circ$ ), with a field of view of  $128 \times 80$  mm<sup>2</sup>. The time is in microseconds and starts at the rupture nucleation. The movie displays the rupture progression as it develops from left to right in the positive  $x_1$ -direction. The formation of both the pressure and the shear shock fronts is visible in the early frames ( $t < 42$   $\mu$ s), and becomes well developed as the rupture advances ( $t \geq 42$   $\mu$ s). The upper half-portion of the pressure shock front is extensional, while the lower portion is compressional, in accordance with the rightwards propagation of the left-lateral in-plane shear rupture. A snapshot taken from this sequence, at  $t = 58$   $\mu$ s, is reported in Fig. 2c. The presence of both the pressure and shear shock fronts indicates the supersonic nature of the rupture.
